# Supplementary material for: The underlying mechanism of proinflammatory NF-κB activation by the mTORC2/Akt/IKKα pathway during skin aging
Source: PubMed Central journal article supplement (PMC5288141; doi:10.18632/oncotarget.10943), 2016-07-29
Supplement: oncotarget-07-52685-s001.pdf [file oncotarget-07-52685-s001.pdf]

# The underlying mechanism of proinflammatory NF- $\kappa$ B activation by the mTORC2/Akt/IKK $\alpha$ pathway during skin aging

## Supplementary Material

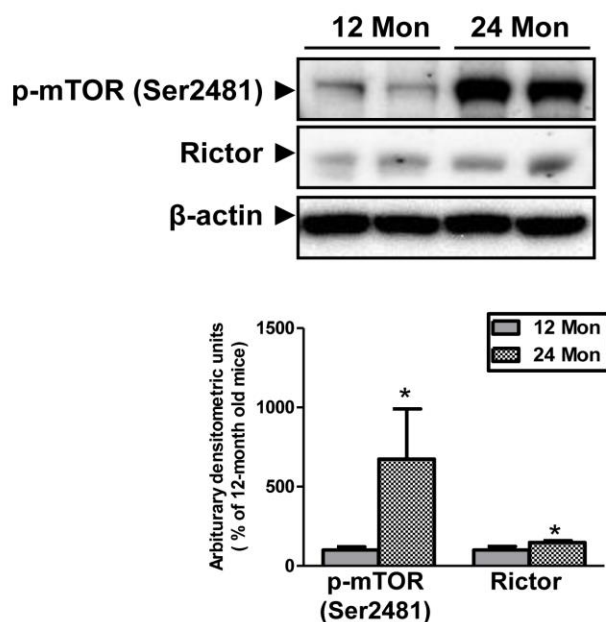

**Supplementary figure 1. Alteration of mTORC2 activity in aged liver.** Western blotting analysis of the level of mTOR phosphorylated at Ser2481 and Rictor in liver homogenates of 12- and 24-month-old mice. The blots were quantified by densitometry. The blots of phospho-mTOR (Ser2481) and Rictor were normalized to  $\beta$ -actin. Bars represent the mean percentage value  $\pm$  SEM in 12-month-old mice (n = 6, \* $p$  < 0.05 vs. 12-month-old mice).

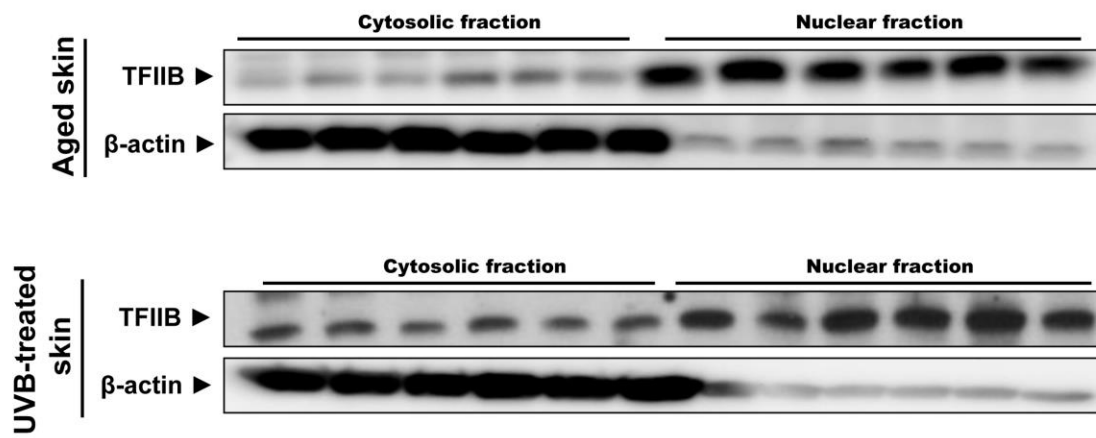

**Supplementary figure 2. Validation of fractionation of skin homogenate.** Western blotting analysis of TFIIB and  $\beta$ -actin to verify the fractionation of skin homogenates. Three samples were randomly chosen from each group.
